## Certificate in Business Administration Program

The ASA is pleased to announce the 2010 Certificate in Business Administration Program. The program is designed to provide physicians with the business skills needed to successfully manage the operations and functions of their health care organization or medical practice. The first on-site session will be held the weekend of **March 20-21, 2010**, at the Woodlands Resort and Conference Center in Houston, Texas. Three additional on-site sessions at the Woodlands will be held throughout the year. Please see the other dates below:

**August 14-15, 2010**

**November 13-14, 2010**

**February 12-13, 2011**

The program will consist of a total of 10 modules. Eight of the modules will be presented at the on-site sessions, and two of the modules will be completed through distance learning via DVD/ROM. We still have space available for the course, so sign up today. The brochure is now available on the ASA Web site at **[www.asahq.org/2010CBA](http://www.asahq.org/2010CBA)**. For additional information, please feel free to call Mary Teister in the ASA office at (847) 268-9139.

---

## Present Your Medically Challenging Cases at the 2010 Annual Meeting

*Please Note the New, Earlier Submission Deadline of May 1!*

Five years ago, Andrew D. Rosenberg, M.D. and the Committee on Scientific and Educational Exhibits introduced a new section at the ASA Annual Meeting that allowed physicians, both attendings and residents, to present medically challenging cases that they have managed. The section has been a resounding success, and each year the number of presentations has grown, with more than 740 cases presented at last year's Annual Meeting. Discussion is very lively at the poster presentations, and each year the committee has strived to provide the most interactive and educational experience possible. Last year, the introduction of the moderated discussion allowed an even livelier and educational interaction. In 2010, we will also be offering the opportunity to designate your presentation as part of a section on patient safety in conjunction with the Anesthesia Patient Safety Foundation. Why don't you consider presenting at this year's meeting in San Diego? The section provides a dynamic and informative forum for physicians to share their experiences, teach others how they have handled a difficult situation, and receive feedback as to how others might have proceeded under the same circumstances. It also serves as a forum of potential research projects stemming from the clinical world and allowing application of translational science!

If you have an interesting case that you think others would enjoy hearing about and discussing, please submit it for consideration. Medically challenging presentations are open to ASA members, attendings, and residents and must be submitted online at the Annual Meeting Web site at **[www2.asahq.org/web/index.asp](http://www2.asahq.org/web/index.asp)**. Please note that the deadline for submission has been changed and is now **May 1, 2010**.
